# Supplementary material
Source: PubMed Central journal article supplement (PMC2225987)
Supplement: NIHMS37990-supplement-Supp_Table_1.pdf [file NIHMS37990-supplement-Supp_Table_1.pdf]

## Online Supplementary Table 1

*Gene ontology classification for platelet specific genes with probe set ID, gene title and GenBank accession.*

| <b>Probe Set</b>                                   | <b>Gene Title</b>                             | <b>GenBank Accession</b> |
|----------------------------------------------------|-----------------------------------------------|--------------------------|
| <b>CALCIUM ION BINDING</b>                         |                                               |                          |
| 221160_s_at                                        | calcium binding protein 5                     | AF169159                 |
| 203471_s_at                                        | pleckstrin                                    | AK124424                 |
| 218935_at                                          | EH-domain containing 3                        | AF214736                 |
| 214617_at                                          | perforin 1 (pore forming protein)             | BC047695                 |
| 204619_s_at                                        | chondroitin sulfate proteoglycan 2            | J02814                   |
| <b>CALCIUM-DEPENDENT PHOSPHOLIPASE A2 ACTIVITY</b> |                                               |                          |
| 221027_s_at                                        | phospholipase A2, group XIIIA                 | AY359024                 |
| <b>CALMODULIN BINDING</b>                          |                                               |                          |
| 204081_at                                          | neurogranin (protein kinase C substrate, RC3) | Y09689                   |
| <b>CARBOHYDRATE BINDING</b>                        |                                               |                          |
| 208935_s_at                                        | lectin, galactoside-binding, soluble, 8       | AK098613                 |
| 204563_at                                          | selectin L (lymphocyte adhesion molecule 1)   | AL021940                 |
| 206049_at                                          | selectin P (antigen CD62)                     | M60234                   |
| 208450_at                                          | lectin, galactoside-binding, soluble, 2       | AL022315                 |
| <b>CATALYTIC ACTIVITY</b>                          |                                               |                          |
| 206210_s_at                                        | cholesteryl ester transfer protein, plasma    | BC025739                 |
| 220751_s_at                                        | chromosome 5 open reading frame 4             | AK023820                 |
| 206465_at                                          | lipidosin                                     | AF070624                 |
| <b>C-C CHEMOKINE BINDING</b>                       |                                               |                          |
| 217028_at                                          | chemokine (C-X-C motif) receptor 4            | AF348491                 |
| <b>DNA BINDING</b>                                 |                                               |                          |
| 207156_at                                          | histone 1, H2ai                               | AL009179                 |
| 208180_s_at                                        | histone 1, H4i                                | AF007904                 |
| 215071_s_at                                        | histone 1, H2ac                               | Z80778                   |
| 202708_s_at                                        | histone 2, H2be                               | M60756                   |
| 220936_s_at                                        | H2A histone family, member J                  | BU594879                 |
| <b>HYDROLASE ACTIVITY</b>                          |                                               |                          |
| 219452_at                                          | dipeptidase 2                                 | AJ295149                 |
| 205844_at                                          | vanin 1                                       | U39664                   |
| 213975_s_at                                        | lysozyme (renal amyloidosis)                  | A10156                   |
| 219999_at                                          | mannosidase, alpha, class 2A, member 2        | D55649                   |

205950\_s\_at carbonic anhydrase I BC027890  
207522\_s\_at ATPase, Ca<sup>++</sup> transporting, ubiquitous AF458229

**HIGH-DENSITY LIPOPROTEIN(NF)**

222043\_at clusterin (complement lysis inhibitor) BQ181025

**NUCLEIC ACID BINDING**

206110\_at histone 1, H3a AL009179  
204959\_at myeloid cell nuclear differentiation antigen U30245

**OXIDOREDUCTASE ACTIVITY**

207206\_s\_at arachidonate 12-lipoxygenase M62982  
204041\_at monoamine oxidase B AL008709  
205128\_x\_at prostaglandin-endoperoxide synthase 1 AF440204  
205221\_at homogentisate 1,2-dioxygenase AK124291  
204187\_at guanosine monophosphate reductase L35304  
203913\_s\_at hydroxyprostaglandin dehydrogenase 15-(NAD) J05594  
219077\_s\_at WW domain containing oxidoreductase AF217492

**PROTEASE INHIBITOR ACTIVITY**

209676\_at tissue factor pathway inhibitor J03225

**PROTEIN BINDING**

213790\_at a disintegrin and metalloproteinase domain 12 AK127856  
207414\_s\_at paired basic amino acid cleaving system 4 BC043562  
210321\_at granzyme H (cathepsin G-like 2, protein h-CCPX) J02907  
203662\_s\_at tropomodulin 1 AK095748  
202663\_at Wiskott-Aldrich syndrome protein interacting protein AK097901  
209606\_at pleckstrin homology, Sec7 and coiled-coil domains CD642163  
207926\_at glycoprotein V (platelet) L11238  
214073\_at cortactin M98343

**PURINE NUCLEOTIDE BINDING**

207018\_s\_at RAB27B, member RAS oncogene family AF329499  
212651\_at Rho-related BTB domain containing 1 CB959762  
201451\_x\_at Ras homolog enriched in brain AF493921  
203196\_at ATP-binding cassette, sub-family C, member 4 AF071203  
203086\_at kinesin heavy chain member 2 BC047544

**REGULATOR ACTIVITY**

205590\_at RAS guanyl releasing protein 1 AF081197  
210140\_at cystatin F (leukocystatin) AB029636  
206841\_at phosphodiesterase 6H, cGMP-specific, gamma D45399

**SELENIUM BINDING**

214433\_s\_at selenium binding protein 1 CR456852

**SIGNAL TRANSDUCER ACTIVITY**

|             |                                                        |          |
|-------------|--------------------------------------------------------|----------|
| 205898_at   | chemokine (C-X3-C motif) receptor 1                    | AY016370 |
| 207389_at   | glycoprotein Ib (platelet), alpha polypeptide          | AF395009 |
| 204686_at   | insulin receptor substrate 1                           | BC053895 |
| 206493_at   | integrin, alpha 2b                                     | J02764   |
| 204627_s_at | integrin, beta 3                                       | BQ437000 |
| 204337_at   | regulator of G-protein signalling 4                    | AF493928 |
| 204115_at   | guanine nucleotide binding protein                     | AF493878 |
| 207815_at   | platelet factor 4 variant 1                            | M26167   |
| 206254_at   | epidermal growth factor                                | J02548   |
| 209555_s_at | CD36 antigen (collagen type I receptor)                | AK096858 |
| 336_at      | thromboxane A2 receptor                                | BC028027 |
| 214974_x_at | chemokine (C-X-C motif) ligand 5                       | AF349466 |
| 1405_i_at   | chemokine (C-C motif) ligand 5                         | AF266753 |
| 206204_at   | growth factor receptor-bound protein 14                | BC053559 |
| 217147_s_at | T-cell receptor interacting molecule                   | AJ240085 |
| 208406_s_at | GRB2-related adaptor protein 2                         | CR456498 |
| 204319_s_at | regulator of G-protein signalling 10                   | AF493934 |
| 203485_at   | reticulon 1                                            | L10335   |
| 206655_s_at | glycoprotein Ib (platelet), beta polypeptide           | AF006988 |
| 220646_s_at | killer cell lectin-like receptor subfamily F, member 1 | AJ305370 |
| 219947_at   | C-type (calcium dependent) lectin                      | AF328684 |
| 207526_s_at | interleukin 1 receptor-like 1                          | AB029084 |
| 210375_at   | prostaglandin E receptor 3 (subtype EP3)               | L32662   |
| 204993_at   | guanine nucleotide binding protein (G protein)         | AF493899 |
| 210448_s_at | purinergic receptor P2X, ligand-gated ion channel, 5   | AF070573 |
| 212587_s_at | protein tyrosine phosphatase, receptor type, C         | AY567999 |
| 204018_x_at | hemoglobin, alpha 1                                    | AF349571 |
| 209116_x_at | hemoglobin, beta                                       | AF007546 |
| 209894_at   | leptin receptor                                        | U52914   |
| 220005_at   | G protein-coupled receptor 86                          | AF345565 |
| 205671_s_at | major histocompatibility complex, class II, DO beta    | M26040   |
| 206960_at   | G protein-coupled receptor 23                          | AF005419 |
| 207651_at   | platelet activating receptor homolog                   | AF002986 |
| 203817_at   | guanylate cyclase 1, soluble, beta 3                   | BC047620 |
| 206637_at   | G protein-coupled receptor 105                         | AF456925 |
| 206390_x_at | platelet factor 4 (chemokine (C-X-C motif) ligand 4)   | AF349466 |
| 205572_at   | angiopoietin 2                                         | AF218015 |
| 205608_s_at | angiopoietin 1                                         | BC029406 |
| 205114_s_at | chemokine (C-C motif) ligand 3                         | D00044   |

**STRUCTURAL MOLECULE ACTIVITY**

|             |                            |          |
|-------------|----------------------------|----------|
| 217428_s_at | collagen, type X, alpha 1  | X98568   |
| 214146_s_at | pro-platelet basic protein | AF349466 |
| 205923_at   | reelin                     | AK093843 |

|             |                            |          |
|-------------|----------------------------|----------|
| 208601_s_at | tubulin, beta 1            | AJ292757 |
| 202202_s_at | laminin, alpha 4           | X91171   |
| 201438_at   | collagen, type VI, alpha 3 | X06196   |
| 207808_s_at | protein S (alpha)          | AY308744 |

**TRANSCRIPTION COFACTOR ACTIVITY**

|           |                                           |        |
|-----------|-------------------------------------------|--------|
| 205267_at | POU domain, class 2, associating factor 1 | Z49194 |
|-----------|-------------------------------------------|--------|

**TRANSFERASE ACTIVITY**

|             |                                         |          |
|-------------|-----------------------------------------|----------|
| 211560_s_at | aminolevulinate, delta-, synthase 2     | AY532109 |
| 206963_s_at | N-acetyltransferase 8                   | AF187813 |
| 209459_s_at | 4-aminobutyrate aminotransferase        | L32961   |
| 213598_at   | putative dimethyladenosine transferase  | AJ009761 |
| 203305_at   | coagulation factor XIII, A1 polypeptide | AF218234 |

**TRANSITION METAL ION BINDING**

|             |                 |          |
|-------------|-----------------|----------|
| 206177_s_at | arginase, liver | BT006741 |
|-------------|-----------------|----------|

**TRANSPORTER ACTIVITY**

|           |                                    |          |
|-----------|------------------------------------|----------|
| 219090_at | solute carrier family 24, member 3 | AL139429 |
| 205592_at | solute carrier family 4, member 1  | L35930   |
| 212531_at | lipocalin 2                        | N79823   |
| 206606_at | lipase, hepatic                    | J03895   |

**ZINC ION BINDING**

|             |                                                       |          |
|-------------|-------------------------------------------------------|----------|
| 214715_x_at | zinc finger protein 160                               | AB046831 |
| 208137_x_at | zinc finger protein 611                               | AK097434 |
| 206169_x_at | ubiquitous tetratricopeptide containing protein RoXaN | BC047002 |

---
