# Supplementary material
Source: PubMed Central journal article supplement (PMC2225987)
Supplement: NIHMS37990-supplement-Supp_Table_2.pdf [file NIHMS37990-supplement-Supp_Table_2.pdf]

**Online Supplementary Table 2.***Platelet specific/abundant genes*

| <b>Probeset_id</b> | <b>Gene Title</b>                            | <b>Gene Symbol</b> | <b>Unigene ID</b> |
|--------------------|----------------------------------------------|--------------------|-------------------|
| 224594_x_at        | actin, beta                                  | ACTB               | Hs.520640         |
| 201891_s_at        | beta-2-microglobulin                         | B2M                | Hs.534255         |
| 204655_at          | chemokine (C-C motif) ligand 5               | CCL5               | Hs.514821         |
| 204081_at          | clusterin                                    | CLU                | Hs.436657         |
| 203305_at          | coagulation factor XIII                      | F13A1              | Hs.335513         |
| 200021_at          | cofilin 1                                    | CFL1               | Hs.170622         |
| 200748_s_at        | ferritin, heavy polypeptide 1                | FTH1               | Hs.558804         |
| 212788_x_at        | ferritin, light polypeptide                  | FTL                | Hs.558330         |
| 200736_s_at        | glutathione peroxidase 1                     | GPX1               | Hs.76686          |
| 200080_s_at        | H3 histone, family 3A                        | H3F3A              | Hs.533624         |
| 214414_x_at        | hemoglobin, alpha                            | HBA2               | Hs.398636         |
| 211696_x_at        | hemoglobin, beta                             | HBB                | Hs.523443         |
| 213515_x_at        | hemoglobin, gamma G                          | HBG1 /// HBG2      | Hs.444301         |
| 209806_at          | histone 1, H2bk                              | HIST1H2BK          | Hs.437275         |
| 206110_at          | histone 1, H3h                               | HIST1H3H           | Hs.70937          |
| 211628_x_at        | Human ferritin H                             | FTHP1              | Hs.453583         |
| 217731_s_at        | integral membrane protein 2B                 | ITM2B              | Hs.446450         |
| 206493_at          | integrin, alpha 2b                           | ITGA2B             | Hs.411312         |
| 211945_s_at        | integrin, beta 1                             | ITGB1              | Hs.429052         |
| 200904_at          | major histocompatibility complex, class I, E | HLA-E              | Hs.381008         |
| 217963_s_at        | nerve growth factor receptor                 | NGFRAP1            | Hs.448588         |
| 208791_at          | neurogranin                                  | NRGN               | Hs.26964          |
| 210774_s_at        | nuclear receptor coactivator 4               | NCOA4              | Hs.522932         |
| 200077_s_at        | ornithine decarboxylase antizyme 1           | OAZ1               | Hs.446427         |
| 206390_x_at        | platelet factor 4                            | PF4                | Hs.81564          |
| 207815_at          | platelet factor 4 variant 1                  | PF4V1              | Hs.72933          |
| 214146_s_at        | pro-platelet basic protein                   | PPBP               | Hs.2164           |
| 211600_at          | protein tyrosine phosphatase                 | PTPRO              | Hs.16087          |
| 201859_at          | proteoglycan 1, secretory granule            | PRG1               | Hs.1908           |
| 211921_x_at        | prothymosin alpha mRNA                       | PTMA               | Hs.459927         |
| 223809_at          | regulator of G-protein signalling 18         | RGS18              | Hs.440890         |
| 229563_s_at        | ribosomal protein L10a                       | RPL10A             | Hs.546269         |
| 200665_s_at        | osteonectin                                  | SPARC              | Hs.111779         |
| 210592_s_at        | spermidine/spermine N1-acetyltransferase     | SAT                | Hs.28491          |
| 218032_at          | stannin                                      | SNN                | Hs.459952         |
| 201061_s_at        | stomatin                                     | STOM               | Hs.253903         |
| 216438_s_at        | thymosin                                     | TMSB4X             | Hs.522584         |

|             |                      |       |           |
|-------------|----------------------|-------|-----------|
| 230690_at   | tubulin, beta 1      | TUBB1 | Hs.303023 |
| 200633_at   | ubiquitin B          | UBB   | Hs.356190 |
| 208998_at   | uncoupling protein 2 | UCP2  | Hs.80658  |
| 200931_s_at | vinculin             | VCL   | Hs.500101 |

---
